# Supplementary material for: The Effects of the Combination of Buckwheat D-Fagomine and Fish Omega-3 Fatty Acids on Oxidative Stress and Related Risk Factors in Pre-Obese Rats
Source: PubMed Central journal article supplement (PMC7913974; doi:10.3390/foods10020332), 2021-02-04
Supplement: foods-10-00332-s001.pdf [file foods-10-00332-s001.pdf]

## Electronic Supplementary Information

# The Effects of the Combination of Buckwheat D-Fagomine and Fish Omega-3 Fatty Acids on Oxidative Stress and Related Risk Factors in Pre-Obese Rats

**Bernat Miralles-Pérez**<sup>1</sup>, **Maria Rosa Nogués**<sup>1,\*</sup>, **Vanessa Sánchez-Martos**<sup>1</sup>, **Núria Taltavull**<sup>1</sup>, **Lucía Méndez**<sup>2</sup>, **Isabel Medina**<sup>2</sup>, **Sara Ramos-Romero**<sup>3,4</sup>, **Josep L. Torres**<sup>3</sup> and **Marta Romeu**<sup>1</sup>

<sup>1</sup> Universitat Rovira i Virgili, Department of Basic Medical Sciences, Pharmacology Unit, Functional Nutrition, Oxidation and Cardiovascular Disease Research Group (NFOC-SALUT), C/ Sant Llorenç 21, E-43201 Reus, Spain; bernat.miralles@urv.cat (B.M.P.); vanessa.sanchez@urv.cat (V.S.-M.); nuria.taltavull@urv.cat (N.T.); marta.romeu@urv.cat (M.R.)

<sup>2</sup> Institute of Marine Research (IIM-CSIC), C/ Eduardo Cabello 6, E-36208 Vigo, Spain; luciamendez@iim.csic.es (L.M.); medina@iim.csic.es (I.M.)

<sup>3</sup> Institute of Advanced Chemistry of Catalonia (IQAC-CSIC), C/ Jordi Girona 18-26, E-08034 Barcelona, Spain; sara.ramos@iqac.csic.es (S.R.-R.); josepluis.torres@iqac.csic.es (J.L.T.)

<sup>4</sup> Current address: Department of Cell Biology, Physiology & Immunology, Faculty of Biology, University of Barcelona, Avd/ Diagonal 643, E-08028 Barcelona, Spain

\* Correspondence: mariarosa.nogues@urv.cat (M.R.N.); Tel.: +34-977-75-9378

**Table S1.** Diet composition.

|                                               | <b>STD</b>         | <b>HF</b>          | <b>FG</b>          | <b>ω-3</b>         | <b>FG&amp;ω-3</b>  |
|-----------------------------------------------|--------------------|--------------------|--------------------|--------------------|--------------------|
| <b>Diet composition</b>                       |                    |                    |                    |                    |                    |
| Flour (g)                                     | 1,000 <sup>a</sup> | 1,000 <sup>b</sup> | 1,000 <sup>b</sup> | 1,000 <sup>b</sup> | 1,000 <sup>b</sup> |
| Fagomine (g)                                  | -                  | -                  | 0.96               | -                  | 0.96               |
| Oil                                           | 0.8 mL             | 0.8 mL             | 0.8 mL             | 0.8 mL             | 0.8 mL             |
|                                               | SBO/kg b.w.        | SBO/kg b.w.        | SBO/kg b.w.        | FO/kg b.w.         | FO/kg b.w.         |
| <b>Macronutrients (% weight)</b>              |                    |                    |                    |                    |                    |
| Protein                                       | 14.3               | 17.0               | 17.0               | 17.0               | 17.0               |
| Fat                                           | 4.0                | 23.0               | 23.0               | 23.0               | 23.0               |
| Carbohydrates                                 | 48.0               | 47.6               | 47.6               | 47.6               | 47.6               |
| <b>Macronutrients (% caloric value)</b>       |                    |                    |                    |                    |                    |
| Protein                                       | 20.0               | 14.7               | 14.7               | 14.7               | 14.7               |
| Fat                                           | 13.0               | 40.6               | 40.6               | 40.6               | 40.6               |
| Carbohydrates                                 | 67.0               | 40.7 <sup>c</sup>  | 40.7 <sup>c</sup>  | 40.7 <sup>c</sup>  | 40.7 <sup>c</sup>  |
| Total energy density<br>(kcal/g) <sup>d</sup> | 2.9                | 4.7                | 4.7                | 4.7                | 4.7                |

Abbreviations: STD, Standard Group; HF, High-Fat Group; FG, Fagomine Group; ω-3, ω-3 PUFA Group; FG&ω-3, Fagomine and ω-3 PUFA Group; SBO, Soybean Oil; FO, Fish Oil; b.w., Body Weight. <sup>a</sup>Teklad Global 14% Protein Rodent Maintenance Diet (Envigo, IN, USA), <sup>b</sup>TD.08811 45% kcal Fat Diet (Envigo, IN, USA), <sup>c</sup>Carbohydrate (available) is calculated by subtracting neutral detergent fiber from total carbohydrates, <sup>d</sup>Energy density was calculated as estimates of metabolizable energy based on the Atwater conversion factors, assigning 4 kcal/g of protein, 9 kcal/g of fat, and 4 kcal/g of available carbohydrate.

**Table S2.** Fatty acid composition (mol %) of soybean and fish oils.

|           | SBO          | FO           |
|-----------|--------------|--------------|
| 14:00     | 0.96 ± 0.02  | 4.37 ± 0.05  |
| 15:00     | 0.15 ± 0.01  | 0.29 ± 0.02  |
| 16:00     | 17.78 ± 0.10 | 10.15 ± 0.16 |
| 16:1 ω-7  | 0.90 ± 0.03  | 4.99 ± 0.04  |
| 17:00     | 0.21 ± 0.01  | 0.45 ± 0.004 |
| 18:00     | 2.07 ± 0.01  | 2.94 ± 0.03  |
| 18:1 ω-9  | 18.75 ± 0.03 | 6.41 ± 0.06  |
| 18:1 ω-7  | 1.52 ± 0.02  | 1.91 ± 0.03  |
| 18:2 ω-6  | 47.55 ± 0.01 | 0.65 ± 0.01  |
| 20:00     | n.d          | 0.32 ± 0.01  |
| 18:3 ω-3  | 4.00 ± 0.04  | 0.36 ± 0.01  |
| 20:1 ω-9  | 1.43 ± 0.09  | 0.98 ± 0.03  |
| 18:4 ω-3  | 0.15 ± 0.004 | 1.51 ± 0.02  |
| 20:2 ω-6  | 0.20 ± 0.05  | 0.21 ± 0.003 |
| 20:3 ω-6  | n.d          | 0.22 ± 0.01  |
| 20:4 ω-6  | 0.40 ± 0.02  | 1.68 ± 0.04  |
| 22:1 ω-11 | 1.08 ± 0.01  | 1.14 ± 0.01  |
| 22:1 ω-9  | 0.25 ± 0.02  | 0.28 ± 0.03  |
| 20:4 ω-3  | 0.20 ± 0.03  | 1.02 ± 0.02  |
| 20:5 ω-3  | 0.70 ± 0.02  | 25.09 ± 0.10 |
| 24:1 ω-9  | 0.28 ± 0.05  | 0.38 ± 0.003 |
| 22:5 ω-3  | 0.26 ± 0.01  | 4.30 ± 0.05  |
| 22:6 ω-3  | 1.15 ± 0.03  | 25.70 ± 0.21 |
| ω-3       | 6.47 ± 0.14  | 58.84 ± 0.16 |
| SFA       | 21.17 ± 0.10 | 18.52 ± 0.22 |
| MUFA      | 24.21 ± 0.11 | 17.22 ± 0.12 |
| PUFA      | 54.62 ± 0.03 | 64.26 ± 0.33 |
| EPA+DHA   | 1.85 ± 0.06  | 50.79 ± 0.31 |

Abbreviations: SBO, Soybean Oil; FO, Fish Oil; SFA; n.d., non-detected; SFA, Saturated Fatty acids; MUFA, Monounsaturated Fatty Acids; PUFA, Polyunsaturated Fatty Acids; EPA, Eicosapentaenoic; DHA, Docosahexaenoic.

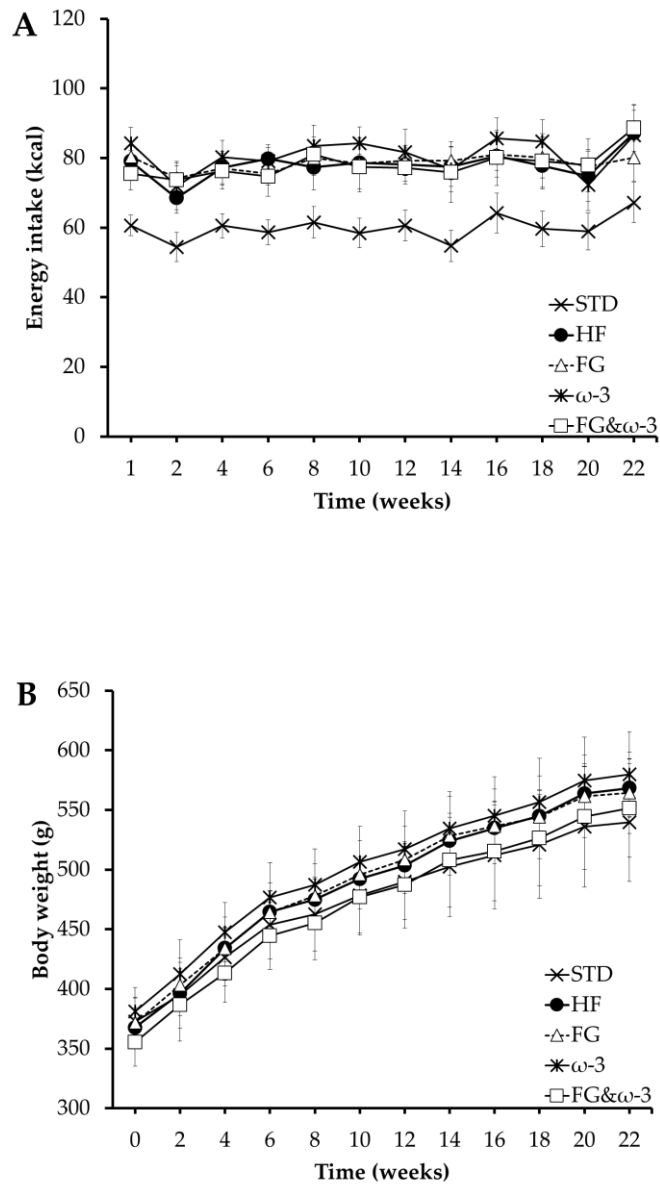

**Figure S1.** (A) Energy intake and (B) body weight throughout the study. Values are expressed as mean  $\pm$  standard deviation, nine rats per group. Abbreviations: STD, Standard group; HF, High-Fat group; FG, Fagomine group;  $\omega$ -3,  $\omega$ -3 PUFA group; FG& $\omega$ -3, Fagomine and  $\omega$ -3 PUFA group. Groups fed a HF diet either with supplement or without supplement showed significantly higher energy intake than the STD group (p-value < 0.05). Nevertheless, no significant differences were observed in body weight among the groups.

**Table S3.** Feed intake, biometric data and insulin resistance biomarkers after 21 weeks of dietary intervention\*

|                                            | <b>STD</b>   | <b>HF</b>                | <b>FG</b>               | <b>ω-3</b>              | <b>FG&amp;ω-3</b>       |
|--------------------------------------------|--------------|--------------------------|-------------------------|-------------------------|-------------------------|
| <b>Intake data</b>                         |              |                          |                         |                         |                         |
| Feed intake (g/day)                        | 20.3 ± 1.6   | 16.3 ± 0.9 <sup>a</sup>  | 16.4 ± 1.2 <sup>a</sup> | 16.8 ± 1.0 <sup>a</sup> | 15.9 ± 1.2 <sup>a</sup> |
| Energetic intake (kcal/day)                | 58.9 ± 4.6   | 76.5 ± 4.3 <sup>a</sup>  | 77.2 ± 5.7 <sup>a</sup> | 79.0 ± 4.7 <sup>a</sup> | 74.8 ± 5.7 <sup>a</sup> |
| <b>Biometric data</b>                      |              |                          |                         |                         |                         |
| Initial body weight (g)                    | 373 ± 20     | 368 ± 17                 | 370 ± 22                | 381 ± 20                | 355 ± 20                |
| Final body weight (g)                      | 540 ± 49     | 568 ± 24                 | 564 ± 34                | 580 ± 36                | 552 ± 41                |
| Body weight gain (g)                       | 167 ± 36     | 201 ± 29                 | 194 ± 21                | 199 ± 30                | 196 ± 24                |
| Perigonadal adipose tissue (g)             | 8.1 ± 1.7    | 13.1 ± 3.9 <sup>a</sup>  | 10.8 ± 1.3              | 13.3 ± 4.4 <sup>a</sup> | 9.9 ± 2.1               |
| Adiposity index (%)                        | 1.5 ± 0.3    | 2.3 ± 0.7 <sup>a</sup>   | 1.9 ± 0.3               | 2.3 ± 0.6 <sup>a</sup>  | 1.8 ± 0.3               |
| Liver (g)                                  | 14.0 ± 1.7   | 14.0 ± 1.1               | 14.6 ± 1.0              | 14.1 ± 1.0              | 14.6 ± 2.3              |
| Hepatosomatic index (%)                    | 2.6 ± 0.1    | 2.4 ± 0.2                | 2.6 ± 0.1               | 2.5 ± 0.1               | 2.6 ± 0.3               |
| <b>Insulin resistance biomarkers</b>       |              |                          |                         |                         |                         |
| OGTT <sup>#</sup> (AUC, mg/mL per 120 min) | 10,350 ± 739 | 10,335 ± 282             | 10,623 ± 475            | 10,864 ± 625            | 10,338 ± 604            |
| Glucose (mmol/L)                           | 3.5 ± 0.4    | 3.9 ± 0.3 <sup>a</sup>   | 3.9 ± 0.3 <sup>a</sup>  | 3.9 ± 0.3 <sup>a</sup>  | 3.8 ± 0.2               |
| Insulin (mU/L)                             | 16.2 ± 9.4   | 52.1 ± 23.9 <sup>a</sup> | 39.3 ± 19.5             | 42.1 ± 20.9             | 40.9 ± 16.5             |

Values are expressed as mean ± standard deviation, nine rats per group. Abbreviations: STD, Standard group; HF, High-Fat group; FG, Fagomine group; ω-3, ω-3 PUFA group; FG&ω-3, Fagomine and ω-3 PUFA group; OGTT, Oral Glucose Tolerance Test; AUC, Area Under the Curve. \*These parameters have partially been published in a previous report [1]. <sup>#</sup>OGTT was performed during week 18.

## References

1. Hereu, M.; Ramos-Romero, S.; Busquets, C.; Atienza, L.; Amézqueta, S.; Miralles-Pérez, B.; Nogués, M.R.; Méndez, L.; Medina, I.; Torres, J.L. Effects of combined d-fagomine and omega-3 PUFAs on gut microbiota subpopulations and diabetes risk factors in rats fed a high-fat diet. *Sci. Rep.* **2019**, *9*, 1–12, doi:10.1038/s41598-019-52678-5.
